# Supplementary material for: Co-expression of TIMP-1 and its cell surface binding partner CD63 in glioblastomas
Source: PubMed Central journal article supplement (PMC5845145; doi:10.1186/s12885-018-4179-y), 2018-03-09
Supplement: 12885_2018_4179_MOESM2_ESM.pdf [file 12885_2018_4179_MOESM2_ESM.pdf]

**Table S1** List of 82 selected genes differentially expressed at the mRNA levels using the Cancer Genome Atlas (TCGA).

|                          | log FC   | Average expression | t        | p-value     | Adj. p-value |
|--------------------------|----------|--------------------|----------|-------------|--------------|
| <b>Upregulated genes</b> |          |                    |          |             |              |
| CHI3L1                   | 3.506922 | 10.53849           | 13.49852 | 6.10295E-32 | 4.55962E-29  |
| PLA2G5                   | 2.776492 | 6.475089           | 15.22195 | 5.27482E-38 | 8.37444E-35  |
| CXCL14                   | 2.744629 | 8.394921           | 10.82745 | 7.45708E-23 | 9.66453E-21  |
| PTX3                     | 2.7443   | 7.158813           | 13.63727 | 1.9998E-32  | 1.69329E-29  |
| EMP3                     | 2.324359 | 9.276723           | 14.36002 | 5.82214E-35 | 6.16225E-32  |
| FABP7                    | 2.270666 | 10.29682           | 8.464807 | 1.78696E-15 | 5.64582E-14  |
| PDPN                     | 2.212204 | 7.784825           | 12.27702 | 1.01757E-27 | 2.87205E-25  |
| DIRAS3                   | 2.106888 | 6.694933           | 12.85126 | 1.08046E-29 | 4.90103E-27  |
| SRPX                     | 2.104007 | 9.881435           | 11.87213 | 2.42772E-26 | 5.40956E-24  |
| NNMT                     | 1.97402  | 8.737411           | 7.864813 | 9.4515E-14  | 2.08861E-12  |
| ACSS3                    | 1.971636 | 6.411783           | 15.64735 | 1.64471E-39 | 5.22238E-36  |
| LTF                      | 1.967538 | 7.7558             | 5.74803  | 2.48316E-08 | 1.8829E-07   |
| PIPOX                    | 1.952258 | 7.66557            | 11.64092 | 1.46529E-25 | 2.90791E-23  |
| CHRNA9                   | 1.944729 | 5.615517           | 13.0853  | 1.67217E-30 | 8.16857E-28  |
| CNIH3                    | 1.940685 | 6.698849           | 16.91855 | 5.15477E-44 | 2.18236E-40  |
| ARSJ                     | 1.926178 | 5.752303           | 17.54484 | 3.14321E-46 | 1.9961E-42   |
| LGALS3                   | 1.919074 | 11.43747           | 14.38852 | 4.62132E-35 | 5.39012E-32  |
| MOXD1                    | 1.87921  | 7.122092           | 8.699329 | 3.62664E-16 | 1.29388E-14  |
| TIMP1                    | 1.840714 | 11.34029           | 14.05284 | 7.00008E-34 | 6.83907E-31  |
| TNFAIP6                  | 1.828614 | 7.424897           | 10.527   | 7.14996E-22 | 7.76167E-20  |
| C21orf62                 | 1.808542 | 6.379375           | 9.741257 | 2.33347E-19 | 1.56812E-17  |
| ITGA7                    | 1.80238  | 7.122253           | 15.58157 | 2.81257E-39 | 7.14449E-36  |
| CA12                     | 1.767784 | 7.37724            | 11.34693 | 1.41806E-24 | 2.50151E-22  |
| KLHL4                    | 1.737814 | 5.910478           | 11.03423 | 1.55225E-23 | 2.19057E-21  |
| POSTN                    | 1.708508 | 5.87961            | 9.384318 | 3.02742E-18 | 1.67179E-16  |
| ANXA1                    | 1.700277 | 10.26053           | 10.70289 | 1.90915E-22 | 2.26618E-20  |
| CCL2                     | 1.687438 | 8.854627           | 7.380556 | 2.04814E-12 | 3.43638E-11  |
| HRH1                     | 1.657925 | 6.946369           | 15.29494 | 2.91032E-38 | 5.28057E-35  |
| EFEMP2                   | 1.651725 | 8.075478           | 13.61924 | 2.31201E-32 | 1.83531E-29  |
| MT1M                     | 1.646948 | 8.826897           | 7.381991 | 2.02991E-12 | 3.4103E-11   |
| DPYD                     | 1.63535  | 8.327758           | 10.35296 | 2.61858E-21 | 2.48198E-19  |
| C1R                      | 1.629348 | 8.865473           | 11.08132 | 1.08417E-23 | 1.60117E-21  |
| SERPINE1                 | 1.627917 | 7.27665            | 9.336166 | 4.26308E-18 | 2.25606E-16  |
| TNFRSF12A                | 1.62157  | 7.863064           | 15.55697 | 3.43738E-39 | 7.27635E-36  |
| IGFBP2                   | 1.61596  | 9.970375           | 8.054417 | 2.74627E-14 | 6.86621E-13  |
| ELOVL2                   | 1.608268 | 6.391563           | 9.476678 | 1.56648E-18 | 9.16859E-17  |
| FCGBP                    | 1.604532 | 9.521396           | 7.316951 | 3.0403E-12  | 4.95421E-11  |
| LYPD1                    | 1.594336 | 7.824418           | 10.24329 | 5.90689E-21 | 5.17402E-19  |
| CCDC109B                 | 1.590033 | 7.663051           | 13.45763 | 8.47578E-32 | 5.9806E-29   |
| UPP1                     | 1.589994 | 7.277932           | 12.58905 | 8.66238E-29 | 3.14345E-26  |
| EFEMP1                   | 1.575361 | 9.455032           | 8.996473 | 4.65248E-17 | 2.0099E-15   |

|                            |          |          |          |             |             |
|----------------------------|----------|----------|----------|-------------|-------------|
| CLEC5A                     | 1.572177 | 6.054744 | 10.81295 | 8.32138E-23 | 1.0569E-20  |
| SPRY2                      | 1.564268 | 9.383242 | 12.55494 | 1.1348E-28  | 4.00363E-26 |
| CHI3L2                     | 1.556502 | 7.750645 | 6.479946 | 4.46473E-10 | 4.76525E-09 |
| SCG2                       | 1.551559 | 8.769062 | 7.443392 | 1.38345E-12 | 2.39716E-11 |
| HOPX                       | 1.542805 | 11.25642 | 7.986759 | 4.27695E-14 | 1.02687E-12 |
| FZD7                       | 1.536535 | 7.338102 | 10.69889 | 1.9675E-22  | 2.31382E-20 |
| MT3                        | 1.529819 | 10.22169 | 6.652083 | 1.65366E-10 | 1.89036E-09 |
| TMEM158                    | 1.503772 | 9.511583 | 9.57446  | 7.77216E-19 | 4.76881E-17 |
| CHL1                       | 1.501739 | 8.207345 | 7.163432 | 7.81852E-12 | 1.17518E-10 |
| <b>Downregulated genes</b> |          |          |          |             |             |
| EPHB1                      | -1.5071  | 5.527674 | -10.6785 | 2.29471E-22 | 2.67386E-20 |
| EYA1                       | -1.51131 | 5.421593 | -10.1436 | 1.23339E-20 | 9.91478E-19 |
| KCND2                      | -1.52908 | 6.268968 | -7.39769 | 1.8407E-12  | 3.11717E-11 |
| DNM3                       | -1.53479 | 7.001034 | -9.24256 | 8.2723E-18  | 4.13648E-16 |
| DLX5                       | -1.53736 | 4.756159 | -9.04119 | 3.40529E-17 | 1.48628E-15 |
| AGXT2L1                    | -1.53999 | 6.73763  | -5.59899 | 5.39418E-08 | 3.78935E-07 |
| CA10                       | -1.54116 | 5.548342 | -8.38416 | 3.07539E-15 | 9.25606E-14 |
| RAB33A                     | -1.54131 | 6.351293 | -9.12157 | 1.93941E-17 | 9.02288E-16 |
| PAK3                       | -1.58681 | 6.307902 | -10.5799 | 4.8091E-22  | 5.35792E-20 |
| HMP19                      | -1.59019 | 5.403607 | -8.76737 | 2.27342E-16 | 8.59365E-15 |
| SCN3A                      | -1.62287 | 8.060168 | -7.41223 | 1.68106E-12 | 2.86977E-11 |
| BASP1                      | -1.62806 | 9.425308 | -10.8609 | 5.78966E-23 | 7.65985E-21 |
| SOX11                      | -1.64432 | 7.376329 | -6.90681 | 3.68376E-11 | 4.8992E-10  |
| DAAM2                      | -1.64559 | 6.899471 | -9.36588 | 3.45164E-18 | 1.88152E-16 |
| INA                        | -1.65203 | 5.924149 | -8.34506 | 3.99727E-15 | 1.17792E-13 |
| SOX4                       | -1.70343 | 7.261486 | -12.7446 | 2.52173E-29 | 1.06762E-26 |
| SH3GL2                     | -1.73391 | 6.38475  | -8.15966 | 1.3728E-14  | 3.63596E-13 |
| COL11A1                    | -1.73456 | 7.172921 | -7.3075  | 3.22351E-12 | 5.22218E-11 |
| FGF13                      | -1.74241 | 6.341501 | -9.216   | 9.97842E-18 | 4.89328E-16 |
| DLL3                       | -1.83234 | 6.403831 | -9.23012 | 9.03229E-18 | 4.46378E-16 |
| SNAP91                     | -1.8951  | 5.872425 | -9.26094 | 7.2645E-18  | 3.64689E-16 |
| KIF21B                     | -1.90414 | 5.841155 | -13.7848 | 6.09322E-33 | 5.52786E-30 |
| STMN2                      | -1.90421 | 7.106939 | -6.48399 | 4.36269E-10 | 4.66811E-09 |
| TMSB15A                    | -1.93779 | 7.953094 | -6.685   | 1.36485E-10 | 1.58455E-09 |
| UGT8                       | -1.94376 | 5.992744 | -10.1481 | 1.19308E-20 | 9.77632E-19 |
| ELAVL4                     | -1.97574 | 7.33395  | -9.72752 | 2.57752E-19 | 1.71398E-17 |
| GPR17                      | -1.9863  | 5.411438 | -8.71951 | 3.1582E-16  | 1.13632E-14 |
| FERMT1                     | -2.19254 | 6.356849 | -12.4623 | 2.36033E-28 | 7.68682E-26 |
| TOX3                       | -2.27034 | 6.860342 | -11.4623 | 5.83303E-25 | 1.08949E-22 |
| CD24                       | -2.42626 | 7.292749 | -11.9554 | 1.26765E-26 | 2.92735E-24 |
| DCX                        | -2.97604 | 6.873156 | -11.8917 | 2.08478E-26 | 4.72836E-24 |
| LPPR1                      | -3.10165 | 7.512313 | -12.3092 | 7.89661E-28 | 2.27943E-25 |
